# Supplementary material for: New insights into the molecular phylogeny, biogeographical history, and diversification of Amblyomma ticks (Acari: Ixodidae) based on mitogenomes and nuclear sequences
Source: Springer Nature journal article supplement (doi:10.1186/s13071-024-06131-w), 2024-03-18

**Figure S2.**

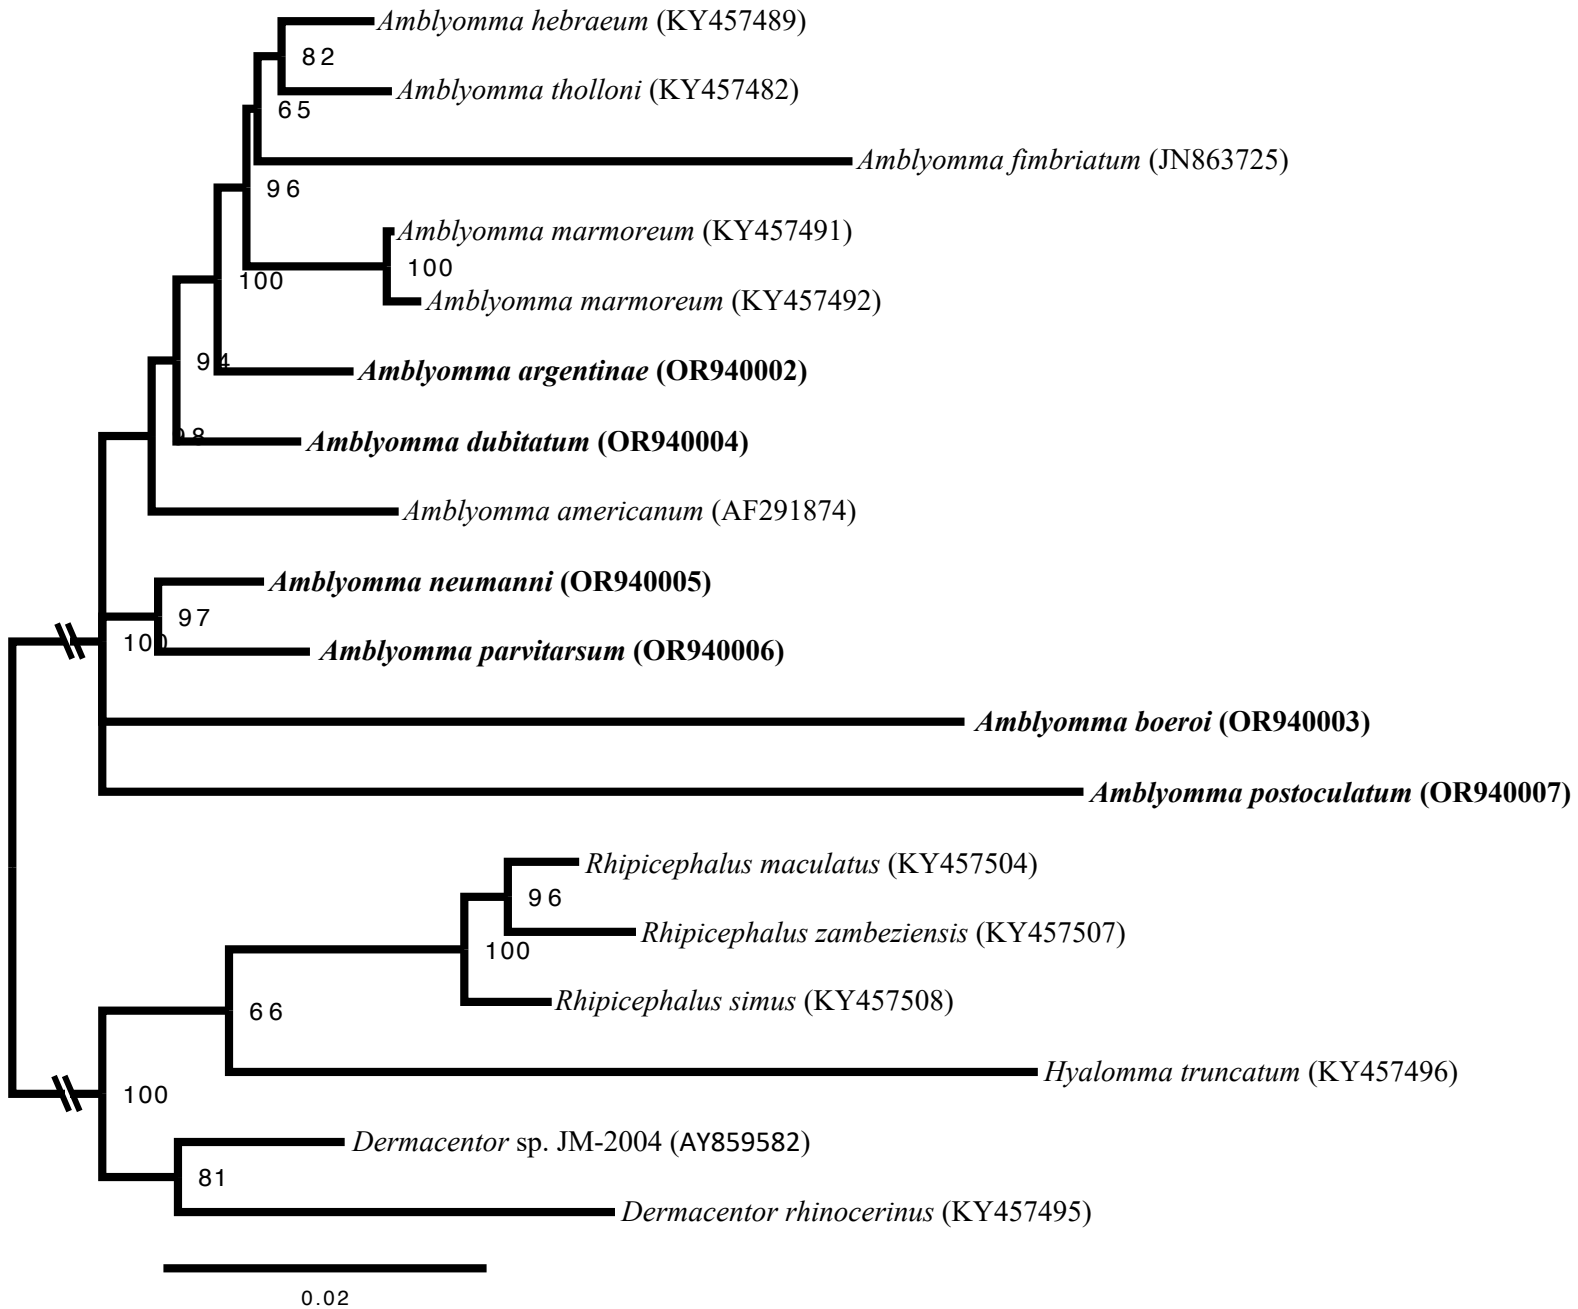

Supplement: MOESM6 [file 13071_2024_6131_MOESM6_ESM.pdf]
