# Supplementary material for: New insights into the molecular phylogeny, biogeographical history, and diversification of Amblyomma ticks (Acari: Ixodidae) based on mitogenomes and nuclear sequences
Source: Springer Nature journal article supplement (doi:10.1186/s13071-024-06131-w), 2024-03-18

Figure S3a.

BioGeoBEARS DEC on garrapatas M0\_unconstr  
 ancstates: global optim, 5 areas max. d=0.0024; e=0; j=0;

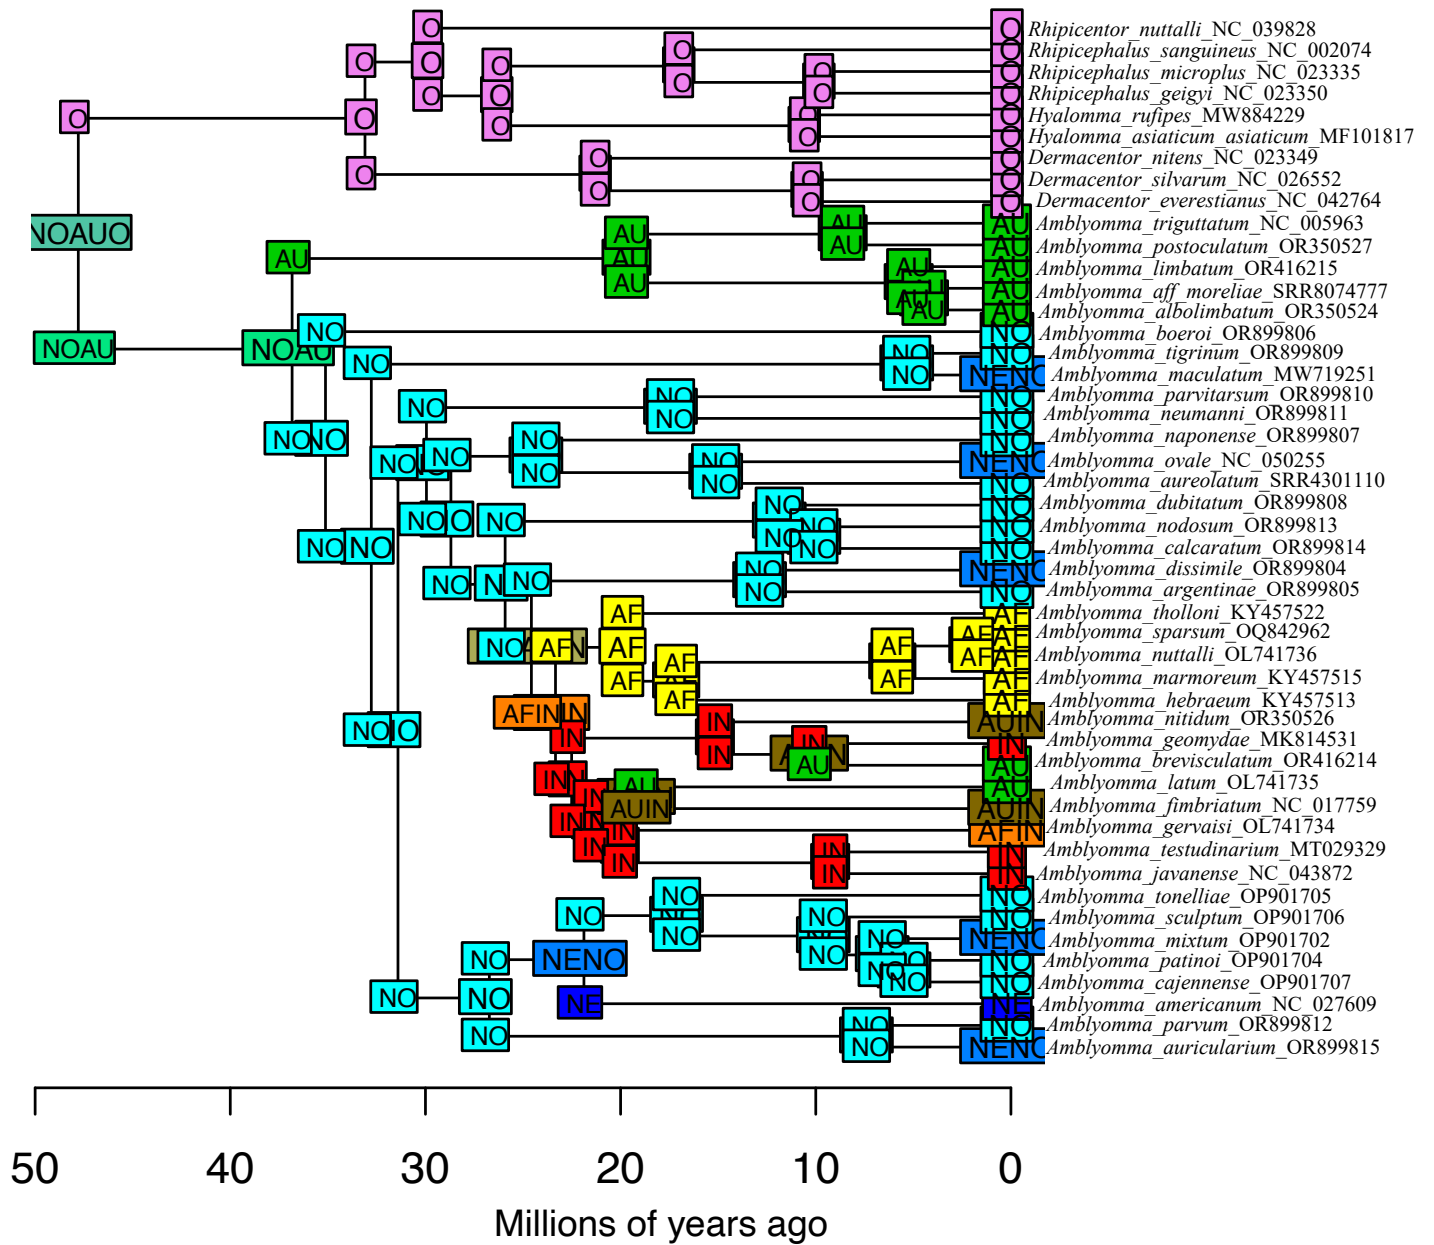

Figure S3b.

BioGeoBEARS DEC+J on garrapatas M0\_unconsti  
 ancstates: global optim, 5 areas max. d=0.0018; e=0; j=0.01

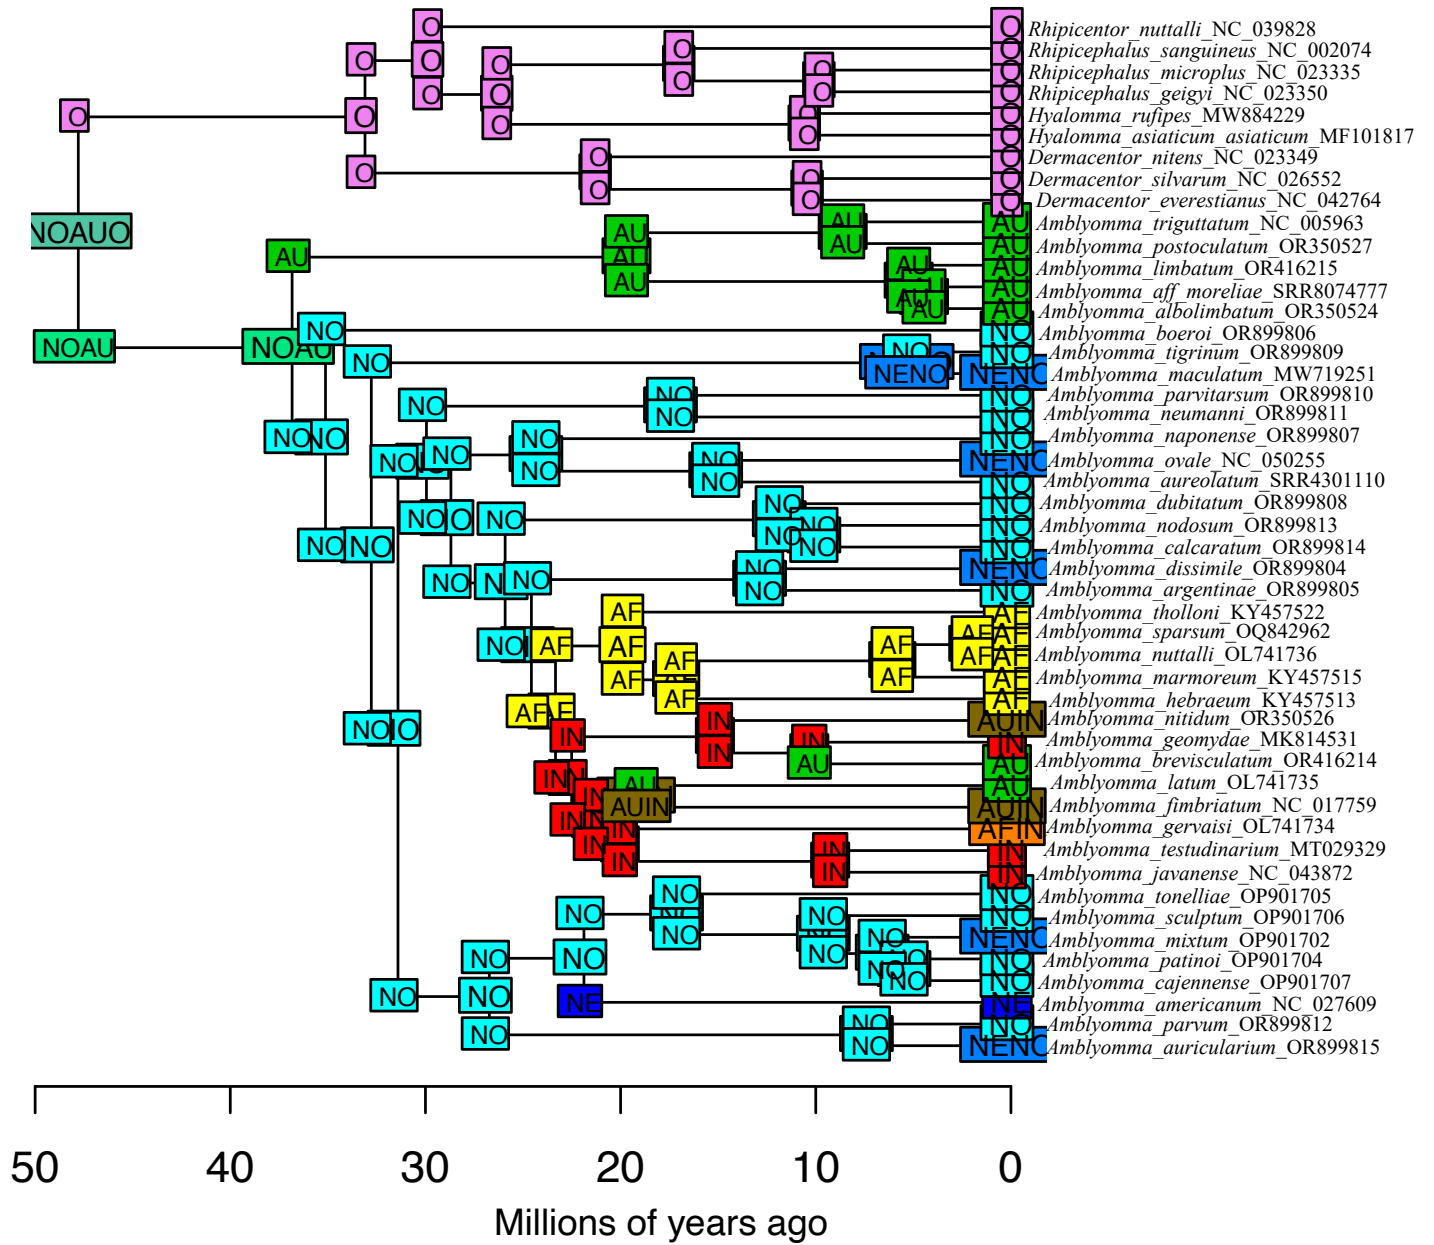

Figure S3c.

BioGeoBEARS DIVALIKE on Psychotria M0\_unconstrained  
ancstates: global optim, 5 areas max. d=0.0028; e=0; j=0; LnL=-69.79

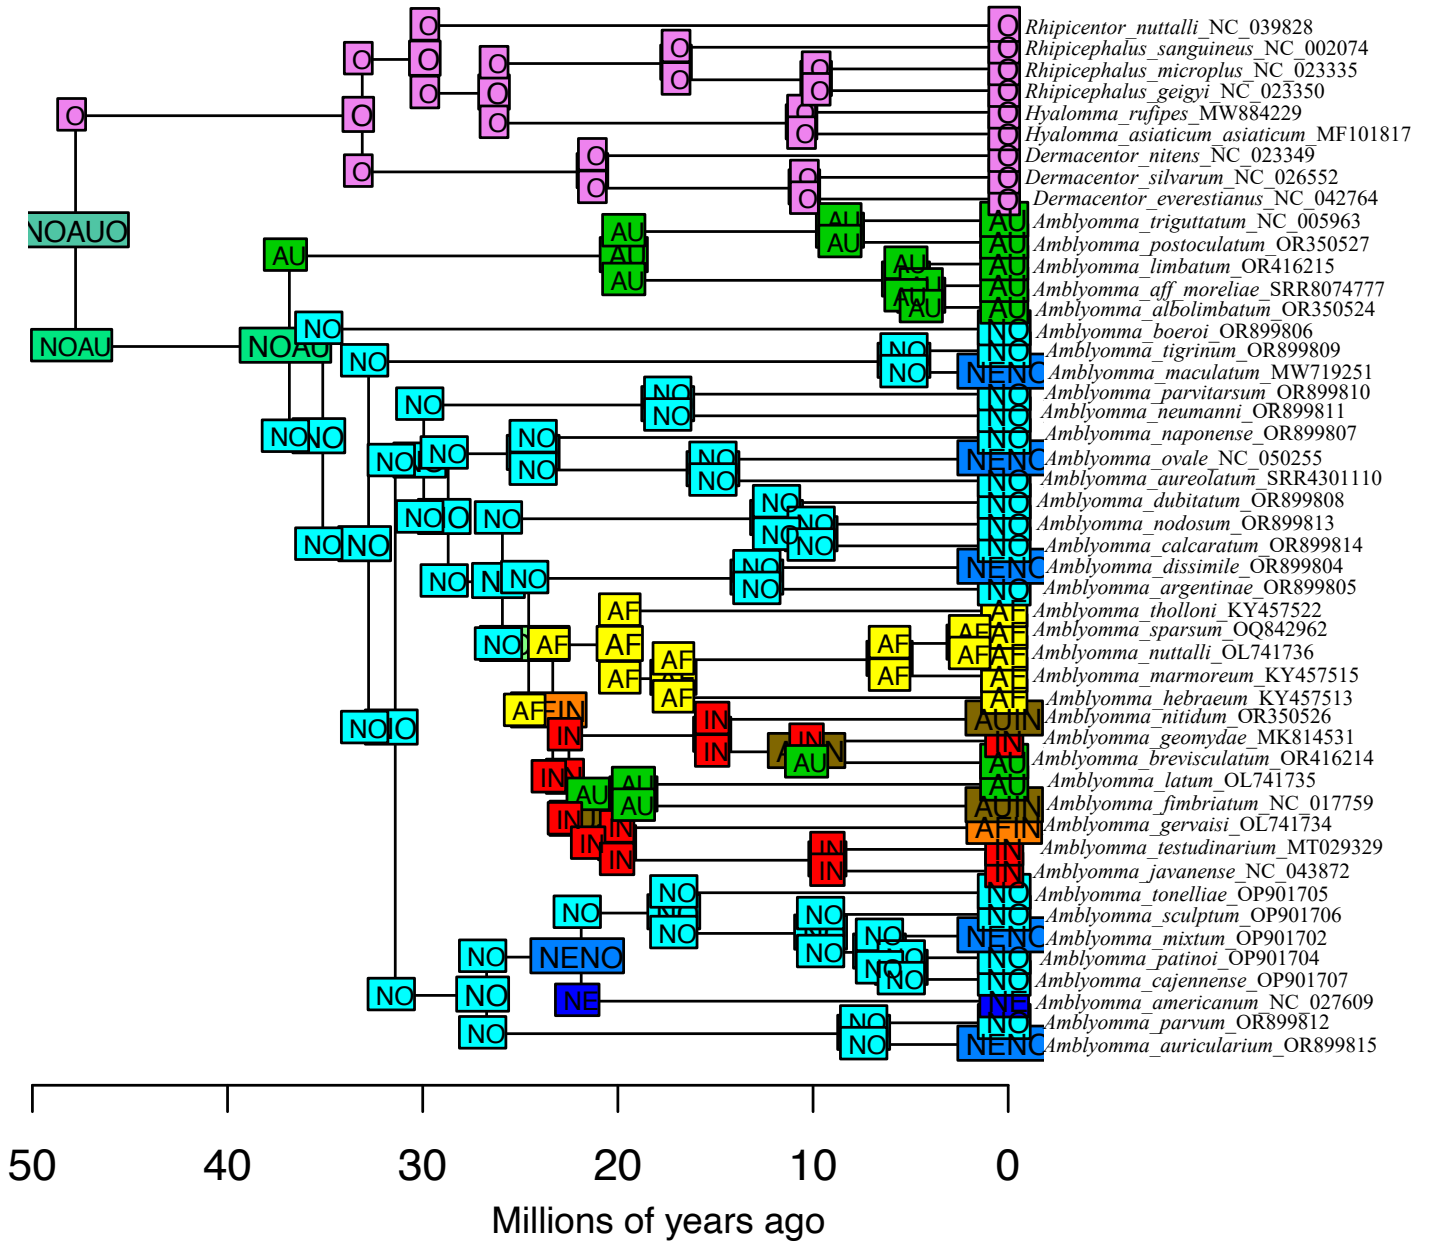

Figure S3d.

BioGeoBEARS DIVALIKE+J on Psychotria M0\_unconstrained  
ancstates: global optim, 5 areas max. d=0.0019; e=0; j=0.0104; LnL=-66.16

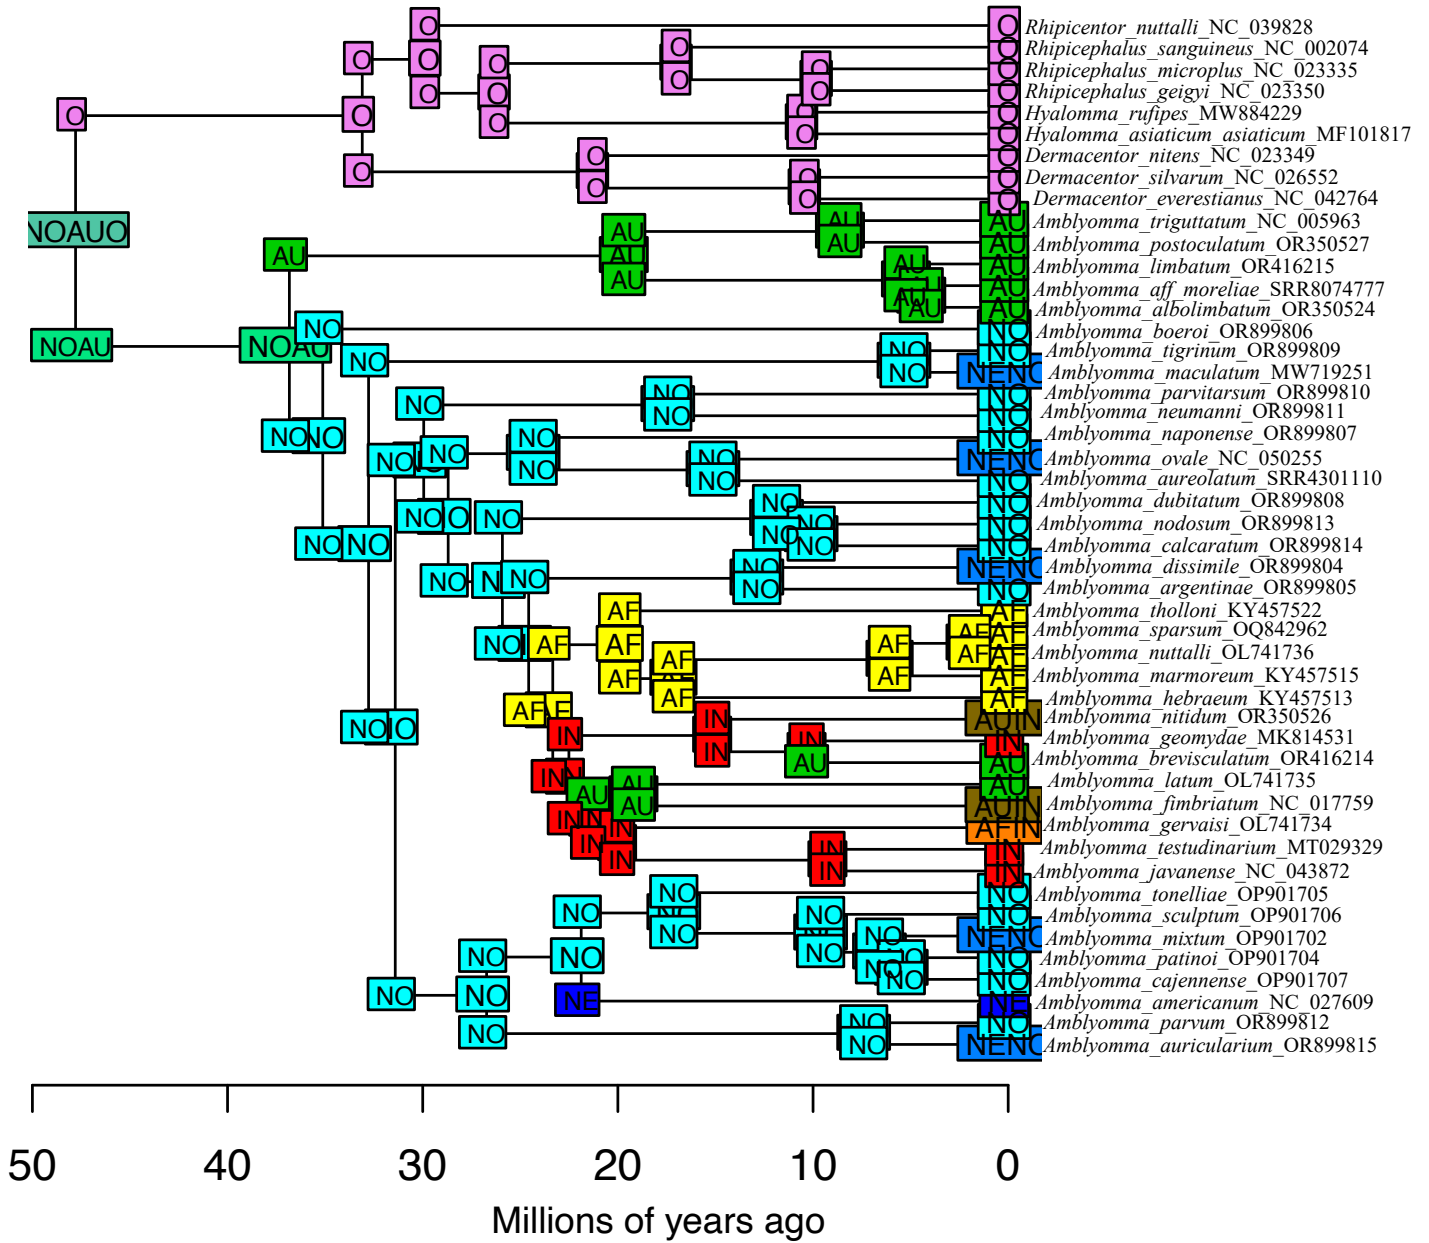

Supplement: MOESM7 [file 13071_2024_6131_MOESM7_ESM.pdf]
